# Supplementary material for: Identification of stages of amelogenesis in the continuously growing mandiblular incisor of C57BL/6J male mice throughout life using molar teeth as landmarks
Source: Frontiers journal article supplement (doi:10.3389/fphys.2023.1144712), 2023-02-10
Supplement: Data_Sheet_1.PDF [file Data_Sheet_1.PDF]

## Supplementary data:

Figure S1:

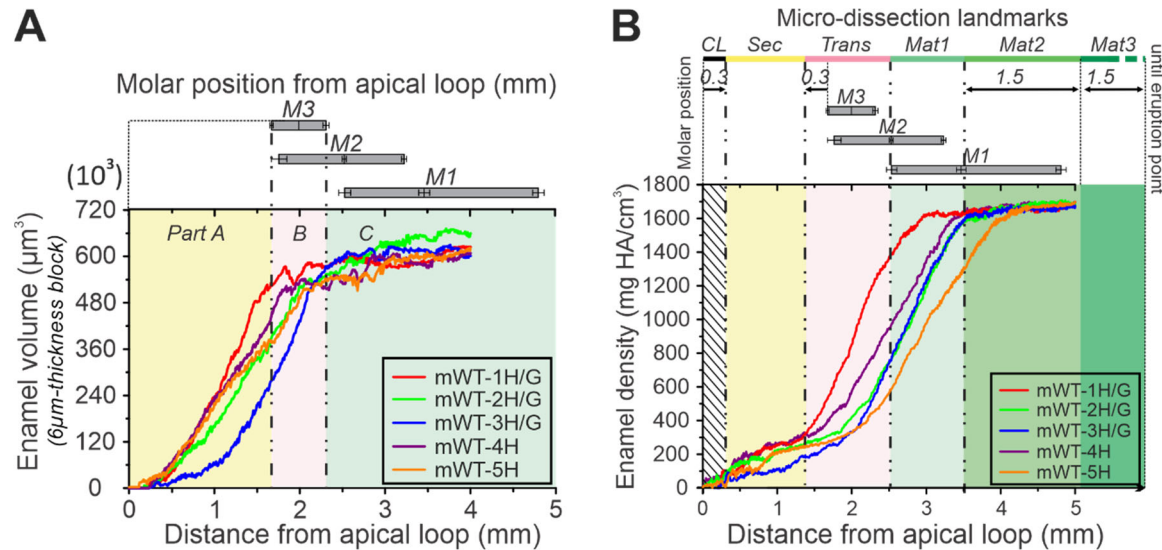

**Figure S1: Mineral profile in mandibular incisors of twelve-week-old mice.** Enamel incisors from 12-wo mice, raised with different diets, hard chows (H) or a combination of hard chows and soft gel food (H/G), were scanned with high resolution micro-CT (6  $\mu\text{m}$  pixel) and analyzed to assess (A) the enamel volume (EV) profile (in  $\mu\text{m}^3$ ) and (B) the mineral density (MD) profile (in mg HA/ $\text{cm}^3$ ) from the apex toward the tip. Molar positions, including M1, M2 and M3, were expressed as the Mean  $\pm$  SD  $\mu\text{m}$  from the apex. The scan plane was perpendicular to the incisor long axis at mid-M2 and the zone of observation (0 – ~4 to 5 mm) was limited to minimize the impact of incisor curvature on the EV calculation; sec: pure secretory, trans: mixture of small portion of late secretory, the whole transition stage and mostly very early maturation, mat1: early maturation, mat2: middle maturation, mat3: late maturation/protection, mWT: male wild-type mice, CL: cervical loop.

Table S1: List of mice used.

|                                                                                          |                                             |                                          |
|------------------------------------------------------------------------------------------|---------------------------------------------|------------------------------------------|
| Mice source                                                                              | mWT C57BL/6J<br>in-bred at U. of Pittsburgh | mWT C57BL/6J<br>ordered from Jackson lab |
| Fed with                                                                                 | Mixed hard chow and gel food                | Only hard chow                           |
| <b>Mice used for micro-CT and histology staining (n=27)</b>                              |                                             |                                          |
| <i>Step 1: Compare enamel densification profile of in-bred mice and commercial mice.</i> |                                             |                                          |
| 12-wo                                                                                    | 3                                           | 2                                        |
| 16-wo                                                                                    | 2                                           | 2                                        |
| <i>Step 2: Analyze enamel densification profile and amelogenesis of in-bred mice.</i>    |                                             |                                          |
| 2-wo                                                                                     | 3                                           | 0                                        |
| 4-wo                                                                                     | 5                                           | 0                                        |
| 8-wo                                                                                     | 4                                           | 0                                        |
| 24-wo                                                                                    | 3                                           | 0                                        |
| 18-mo                                                                                    | 3                                           | 0                                        |
| <b>Mice used for micro-dissection and RNA collection (n=24)</b>                          |                                             |                                          |
| <i>Step 3: Select a mice age to perform experiment for checking chosen landmarks.</i>    |                                             |                                          |
| 12-wo                                                                                    | 24                                          |                                          |
| <b>Total of mice used: n=51</b>                                                          |                                             |                                          |
| mWT: male wild-type; n: number of mice used; wo: week-old; mo: month-old.                |                                             |                                          |

Table S2: Gene expression level of Amelx, Enam and Odam in incisal dental epithelium of 12-week-old male wild-type mice.

| Gene                                                                  | <i>β-actin</i> |       |       |       | <i>Amelx</i> |       |        |       | <i>Enam</i> |       |       |       | <i>Odam</i> |       |       |       |
|-----------------------------------------------------------------------|----------------|-------|-------|-------|--------------|-------|--------|-------|-------------|-------|-------|-------|-------------|-------|-------|-------|
| mRNA expression level – Raw data (Cycles)                             |                |       |       |       |              |       |        |       |             |       |       |       |             |       |       |       |
| Replicons                                                             | 1              | 2     | 3     | 4     | 1            | 2     | 3      | 4     | 1           | 2     | 3     | 4     | 1           | 2     | 3     | 4     |
| <i>Sec</i>                                                            | 21.78          | 21.52 | 21.70 | 21.84 | 12.09        | 11.10 | 10.78  | 12.82 | 16.93       | 16.83 | 16.90 | 16.92 | 18.46       | 17.92 | 17.87 | 19.06 |
| <i>Trans</i>                                                          | 21.91          | 21.34 | 21.40 | 21.97 | 15.41        | 14.12 | 14.03  | 14.78 | 19.98       | 20.06 | 20.19 | 18.96 | 15.45       | 15.80 | 15.76 | 15.76 |
| <i>Mat1</i>                                                           | 21.89          | 21.71 | 21.94 | 21.75 | 19.61        | 17.67 | 17.56  | 21.33 | 23.98       | 23.10 | 23.41 | 24.94 | 14.90       | 14.73 | 14.90 | 14.92 |
| <i>Mat2</i>                                                           | 21.91          | 21.69 | 22.06 | 22.21 | 20.75        | 19.45 | 17.69  | 18.59 | 23.58       | 23.25 | 24.47 | 25.02 | 15.01       | 14.99 | 15.19 | 15.22 |
| <i>Mat3</i>                                                           | 22.03          | 21.73 | 21.96 | 22.38 | 19.63        | 16.41 | 19.56  | 20.62 | 24.92       | 23.29 | 25.30 | 24.51 | 15.45       | 14.95 | 15.15 | 15.46 |
| mRNA expression level - Relative ratio compared to β-actin (times)    |                |       |       |       |              |       |        |       |             |       |       |       |             |       |       |       |
|                                                                       | N=4            |       |       |       | Mean         |       | SD     |       | Mean        |       | SD    |       | Mean        |       | SD    |       |
|                                                                       | <i>Sec</i>     |       |       |       | 553.61       |       | 143.00 |       | 26.81       |       | 2.21  |       | 10.56       |       | 4.89  |       |
|                                                                       | <i>Trans</i>   |       |       |       | 115.02       |       | 45.00  |       | 4.22        |       | 2.68  |       | 59.52       |       | 3.90  |       |
|                                                                       | <i>Mat1</i>    |       |       |       | 7.88         |       | 7.60   |       | 0.28        |       | 0.13  |       | 130.30      |       | 33.95 |       |
|                                                                       | <i>Mat2</i>    |       |       |       | 5.99         |       | 3.19   |       | 0.24        |       | 0.09  |       | 118.10      |       | 24.20 |       |
|                                                                       | <i>Mat3</i>    |       |       |       | 7.58         |       | 6.20   |       | 0.30        |       | 0.29  |       | 116.96      |       | 9.49  |       |
| Change of gene expression during amelogenesis (secretory set as 100%) |                |       |       |       |              |       |        |       |             |       |       |       |             |       |       |       |
|                                                                       | <i>Sec</i>     |       |       |       | 100.00       |       |        |       | 100.00      |       |       |       | 100.00      |       |       |       |
|                                                                       | <i>Trans</i>   |       |       |       | 20.78        |       |        |       | 15.74       |       |       |       | 563.64      |       |       |       |
|                                                                       | <i>Mat1</i>    |       |       |       | 1.42         |       |        |       | 1.04        |       |       |       | 1233.90     |       |       |       |
|                                                                       | <i>Mat2</i>    |       |       |       | 1.08         |       |        |       | 0.90        |       |       |       | 1118.37     |       |       |       |
|                                                                       | <i>Mat3</i>    |       |       |       | 1.37         |       |        |       | 1.12        |       |       |       | 1107.58     |       |       |       |
